# Supplementary material for: Analysis of Cadmium Root Retention for Two Contrasting Rice Accessions Suggests an Important Role for OsHMA2
Source: MDPI journal article supplement (doi:10.3390/plants10040806), 2021-04-20
Supplement: s1 [file s1]

**Table S1.** Primers used for qRT-PCR analysis.

| Gene          | Primer name | Sequence                 |
|---------------|-------------|--------------------------|
| <i>OsPCS1</i> | OsPCS1F     | GAAAGCTTTTGCCGCAATG      |
|               | OsPCS1R     | CCGCCTGGTTGCTTTCC        |
| <i>OsPCS2</i> | OsPCS2F     | TTCGACGAGTCCATGCTTGAC    |
|               | OsPCS2R     | ATGCCCTCCGCCTTCAC        |
| <i>OsHMA3</i> | OsHMA3F     | TCCATCCAACCAAACCCGGAAA   |
|               | OsHMA3R     | TGCCAATGTCCTTCTGTTCCCA   |
| <i>OsHMA2</i> | OsHMA2F     | TGGGTCTCGAGCGTTGAGA      |
|               | OsHMA2R     | GAGCATAATCAACCAGGACAGATG |
| <i>S16</i>    | S16F        | ACGTCGACGAGGCATCCA       |
|               | S16R        | CGCGACCACCGAACTTCTT      |
